# Supplementary material for: Measuring health literacy among low literate people: an exploratory feasibility study with the HLS-EU questionnaire
Source: Springer Nature journal article supplement (doi:10.1186/s12889-017-4391-8), 2017-05-19
Supplement: MOESM1 [file 12300490]

**Additional file 1: Exemplary layout**

**Example 1**

|           |                                                                                                                                                                                | <b>Very easy</b> | <b>Easy</b> | <b>Difficult</b> | <b>Very Difficult</b> |
|-----------|--------------------------------------------------------------------------------------------------------------------------------------------------------------------------------|------------------|-------------|------------------|-----------------------|
| <b>1.</b> | <b>On a scale from very easy to very difficult, how easy would you say it is to find information on treatments of illnesses that concern you?</b>                              |                  |             |                  |                       |
| <b>2.</b> | <b>On a scale from very easy to very difficult, how easy would you say it is to find out where to get professional help when you are ill?</b>                                  |                  |             |                  |                       |
| <b>3.</b> | <b>On a scale from very easy to very difficult, how easy would you say it is to understand what your doctor says to you?</b>                                                   |                  |             |                  |                       |
| <b>4.</b> | <b>On a scale from very easy to very difficult, how easy would you say it is to understand your doctor's or pharmacist's instruction on how to take a prescribed medicine?</b> |                  |             |                  |                       |

**Example 2**

|    |                                                                                                                                                                                   |                  |             |                  |                       |
|----|-----------------------------------------------------------------------------------------------------------------------------------------------------------------------------------|------------------|-------------|------------------|-----------------------|
| 1. | <b>On a scale from very easy to very difficult, how easy would you say it is to</b><br>find information on treatments of illnesses that concern you?                              | <b>Very easy</b> | <b>Easy</b> | <b>Difficult</b> | <b>Very Difficult</b> |
| 2. | <b>On a scale from very easy to very difficult, how easy would you say it is to</b><br>find out where to get professional help when you are ill?                                  | <b>Very easy</b> | <b>Easy</b> | <b>Difficult</b> | <b>Very Difficult</b> |
| 3. | <b>On a scale from very easy to very difficult, how easy would you say it is to</b><br>understand what your doctor says to you?                                                   | <b>Very easy</b> | <b>Easy</b> | <b>Difficult</b> | <b>Very Difficult</b> |
| 4. | <b>On a scale from very easy to very difficult, how easy would you say it is to</b><br>understand your doctor's or pharmacist's instruction on how to take a prescribed medicine? | <b>Very easy</b> | <b>Easy</b> | <b>Difficult</b> | <b>Very Difficult</b> |

**Example 3**

|           |                                                                                                                                                                         | <b>Very easy</b> | <b>Easy</b> | <b>Difficult</b> | <b>Very Difficult</b> |
|-----------|-------------------------------------------------------------------------------------------------------------------------------------------------------------------------|------------------|-------------|------------------|-----------------------|
| <b>1.</b> | On a scale from very easy to very difficult, how easy would you say it is to find information on treatments of illnesses that concern you?                              |                  |             |                  |                       |
| <b>2.</b> | On a scale from very easy to very difficult, how easy would you say it is to find out where to get professional help when you are ill?                                  |                  |             |                  |                       |
| <b>3.</b> | On a scale from very easy to very difficult, how easy would you say it is to understand what your doctor says to you?                                                   |                  |             |                  |                       |
| <b>4.</b> | On a scale from very easy to very difficult, how easy would you say it is to understand your doctor's or pharmacist's instruction on how to take a prescribed medicine? |                  |             |                  |                       |

**Example 4**

|           |                                                                                                                                                                         |                  |             |                  |                       |
|-----------|-------------------------------------------------------------------------------------------------------------------------------------------------------------------------|------------------|-------------|------------------|-----------------------|
| <b>1.</b> | On a scale from very easy to very difficult, how easy would you say it is to find information on treatments of illnesses that concern you?                              | <b>Very easy</b> | <b>Easy</b> | <b>Difficult</b> | <b>Very Difficult</b> |
| <b>2.</b> | On a scale from very easy to very difficult, how easy would you say it is to find out where to get professional help when you are ill?                                  | <b>Very easy</b> | <b>Easy</b> | <b>Difficult</b> | <b>Very Difficult</b> |
| <b>3.</b> | On a scale from very easy to very difficult, how easy would you say it is to understand what your doctor says to you?                                                   | <b>Very easy</b> | <b>Easy</b> | <b>Difficult</b> | <b>Very Difficult</b> |
| <b>4.</b> | On a scale from very easy to very difficult, how easy would you say it is to understand your doctor's or pharmacist's instruction on how to take a prescribed medicine? | <b>Very easy</b> | <b>Easy</b> | <b>Difficult</b> | <b>Very Difficult</b> |

### Example 5

- |                                                                                                                                                                            |           |      |           |                |
|----------------------------------------------------------------------------------------------------------------------------------------------------------------------------|-----------|------|-----------|----------------|
| 1. On a scale from very easy to very difficult, how easy would you say it is to find information on treatments of illnesses that concern you?                              | Very easy | Easy | Difficult | Very Difficult |
| 2. On a scale from very easy to very difficult, how easy would you say it is to een beslissing over uw ziekte te nemen met behulp van de informatie die de arts geeft?     | Very easy | Easy | Difficult | Very Difficult |
| 3. On a scale from very easy to very difficult, how easy would you say it is to find out where to get professional help when you are ill?                                  | Very easy | Easy | Difficult | Very Difficult |
| 4. On a scale from very easy to very difficult, how easy would you say it is to understand your doctor's or pharmacist's instruction on how to take a prescribed medicine? | Very easy | Easy | Difficult | Very Difficult |

**Example 6**

1. **On a scale from very easy to very difficult, how easy would you say it is to find information on treatments of illnesses that concern you?**      Very easy      Easy      Difficult      Very difficult

2. **On a scale from very easy to very difficult, how easy would you say it is to find out where to get professional help when you are ill?**      Very easy      Easy      Difficult      Very difficult

3. **On a scale from very easy to very difficult, how easy would you say it is to understand what your doctor says to you?**  
Very easy      Easy      Difficult      Very difficult

4. **On a scale from very easy to very difficult, how easy would you say it is to understand your doctor's or pharmacist's instruction on how to take a prescribed medicine?**

Very easy      Easy      Difficult      Very difficult
